# Supplementary material for: Microcatheter‐Assisted Circumferential Trabeculotomy versus Conventional Trabeculotomy for the Treatment of Childhood Glaucoma: A Meta‐analysis
Source: Hindawi journal article supplement (doi:10.1155/2020/3716859), 2020-01-01

### Supplementary Figure1: Forest plot for the preoperative IOP between two groups.

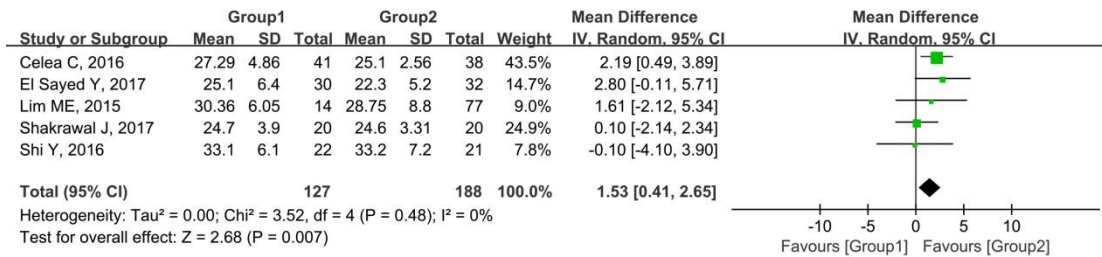

Supplement: f1 [file 3716859.f1.pdf]
